# Supplementary material for: NP monolayer supported transition-metal single atoms for electrochemical water splitting: a theoretical study
Source: Royal Society of Chemistry journal article supplement (doi:10.1039/d1cp04795g), 2022-01-01
Supplement: d1cp04795g1.pdf [file d1cp04795g1.pdf]

## ***Supporting information***

### **NP monolayer supported transition-metal single atoms for electrochemical water splitting: a theoretical study**

Yanwei Wang <sup>a</sup>, Wu Tian <sup>a</sup>, Jin Wan <sup>a</sup>, Gangquan Xiong <sup>b</sup>,

Huijuan Zhang <sup>a\*</sup>, Yu Wang <sup>a, b\*</sup>

<sup>a</sup> *The School of Chemistry and Chemical Engineering, State Key Laboratory of Power Transmission Equipment & System Security and New Technology, Chongqing University, 174 Shazheng Street, Shapingba District, Chongqing City, 400044, PR China*

<sup>b</sup> *The School of Electrical Engineering, Chongqing University, 174 Shazheng Street, Shapingba District, Chongqing City 400044, PR China*

***Corresponding author, Yu Wang; Huijuan Zhang***

***\*E-mail: [wangy@cqu.edu.cn](mailto:wangy@cqu.edu.cn); [zhanghj@cqu.edu.cn](mailto:zhanghj@cqu.edu.cn)***

### *Gibbs Free Energy Computations (OER processes)*

The Gibbs free energy changes of four elementary steps for OER processes can be described as:  $\Delta G_1 = \Delta G_{\text{OH}^*}$ ,  $\Delta G_2 = \Delta G_{\text{O}^*} - \Delta G_{\text{OH}^*}$ ,  $\Delta G_3 = \Delta G_{\text{OOH}^*} - \Delta G_{\text{O}^*}$ ,  $\Delta G_4 = 4.92 - \Delta G_{\text{OOH}^*}$ . Under electrode potential  $U = 0$  V, the  $\Delta G$  for all the four elementary steps (OER processes) can be calculated by:

- (1)  $\Delta G_1 = G(\text{OH}^*) + 0.5G(\text{H}_2) - G(\text{H}_2\text{O}) - G(*)$
- (2)  $\Delta G_2 = G(\text{O}^*) + 0.5G(\text{H}_2) - G(\text{OH}^*)$
- (3)  $\Delta G_3 = G(\text{OOH}^*) + 0.5G(\text{H}_2) - G(\text{H}_2\text{O}) - G(\text{O}^*)$
- (4)  $\Delta G_4 = 4.92 + 2G(\text{H}_2\text{O}) - 2G(\text{H}_2) + 0.5G(\text{H}_2) - G(\text{OOH}^*)$

### *With Spin vs. Without Spin*

On the one hand, we examine the effects of spin polarization to the system for the HER and the results show that there is almost no difference with and without spin treatment in Table S4. On the other hand, Pt@NP shows the lowest  $\eta^{\text{OER}}$  of only 0.495 V, which is superior to the current best OER catalysts IrO<sub>2</sub>. Thus we also examine the effects of spin polarization on Pt@NP for OER, as shown in Table S5.

To sum up, different spin states only have small and negligible effects on the relative energy difference. Thus, we neglect the effects of spin polarization on the systems and it will not influence our conclusion.

Table S1. Comparison of lattice constants (all in Å) of the studied NP monolayer between the reported simulations and our calculation.

|              | Our calculation |          | Reference <sup>1</sup> |          | Reference <sup>2</sup> |          |
|--------------|-----------------|----------|------------------------|----------|------------------------|----------|
|              | <i>a</i>        | <i>b</i> | <i>a</i>               | <i>b</i> | <i>a</i>               | <i>b</i> |
| NP monolayer | 3.611           | 2.733    | 3.611                  | 2.733    | 3.61                   | 2.73     |

Table S2. Adsorption free energies of OH, O, OOH and H (eV) on single TM supported on NP monolayer.

| Single TM atom | $\Delta G_{\text{OH}}^*$ | $\Delta G_{\text{O}}^*$ | $\Delta G_{\text{OOH}}^*$ | $\Delta G_{\text{H}}^*$ |
|----------------|--------------------------|-------------------------|---------------------------|-------------------------|
| Sc             | -1.672                   | -0.193                  | 1.573                     | 0.083                   |
| Ti             | -1.614                   | -1.469                  | 1.967                     | -0.004                  |
| V              | -1.515                   | -1.710                  | 1.791                     | -0.051                  |
| Cr             | -0.539                   | -0.682                  | 2.406                     | 0.712                   |
| Mn             | 0.195                    | 0.145                   | 3.145                     | 0.628                   |
| Fe             | 0.563                    | 0.789                   | 3.683                     | 0.400                   |
| Co             | 0.067                    | 1.260                   | 3.088                     | 0.565                   |
| Ni             | 0.536                    | 2.544                   | 3.574                     | 0.559                   |
| Cu             | 0.822                    | 3.426                   | 3.989                     | 0.861                   |
| Nb             | -2.065                   | -2.455                  | 1.261                     | -0.368                  |
| Mo             | -0.549                   | -1.616                  | 2.017                     | 0.221                   |
| Tc             | 0.345                    | 0.295                   | 3.356                     | 0.588                   |
| Ru             | 0.611                    | 0.709                   | 3.689                     | 0.134                   |
| Rh             | 0.713                    | 1.536                   | 3.314                     | 0.549                   |
| Pd             | 1.146                    | 3.338                   | 3.942                     | 0.889                   |
| Ag             | 1.223                    | 4.128                   | 4.260                     | 0.805                   |
| Ta             | -2.473                   | -2.765                  | 0.967                     | -0.811                  |
| Re             | -0.046                   | -0.453                  | 2.838                     | 0.321                   |
| Os             | 0.079                    | 0.234                   | 3.493                     | -0.172                  |
| Ir             | 0.931                    | 0.793                   | 4.040                     | 0.017                   |
| Pt             | 1.507                    | 2.849                   | 4.574                     | 0.446                   |
| Au             | 0.374                    | 2.868                   | 3.618                     | -0.331                  |

Table S3. Reaction free energy (eV vs RHE) of elementary step for OER at U = 0V on single TM atom supported on NP monolayer.

| Single TM atom | $\Delta G_1$ | $\Delta G_2$ | $\Delta G_3$ | $\Delta G_4$ |
|----------------|--------------|--------------|--------------|--------------|
| Sc             | -1.672       | 1.479        | 1.766        | 3.347        |
| Ti             | -1.614       | 0.145        | 3.436        | 2.953        |
| V              | -1.515       | -0.195       | 3.501        | 3.129        |
| Cr             | -0.539       | -0.143       | 3.088        | 2.514        |
| Mn             | 0.195        | -0.050       | 3.000        | 1.775        |
| Fe             | 0.563        | 0.226        | 2.894        | 1.237        |
| Co             | 0.067        | 1.193        | 1.828        | 1.832        |
| Ni             | 0.536        | 2.008        | 1.030        | 1.346        |
| Cu             | 0.822        | 2.604        | 0.563        | 0.931        |
| Nb             | -2.065       | -0.390       | 3.716        | 3.659        |
| Mo             | -0.549       | -1.067       | 3.633        | 2.903        |
| Tc             | 0.345        | -0.050       | 3.061        | 1.564        |
| Ru             | 0.611        | 0.098        | 2.980        | 1.231        |
| Rh             | 0.713        | 0.823        | 1.778        | 1.606        |
| Pd             | 1.146        | 2.192        | 0.604        | 0.978        |
| Ag             | 1.223        | 2.905        | 0.132        | 0.660        |
| Ta             | -2.473       | -0.292       | 3.732        | 3.953        |
| Re             | -0.046       | -0.407       | 3.291        | 2.082        |
| Os             | 0.079        | 0.155        | 3.259        | 1.427        |
| Ir             | 0.931        | -0.138       | 3.247        | 0.880        |
| Pt             | 1.507        | 1.342        | 1.725        | 0.346        |
| Au             | 0.374        | 2.494        | 0.750        | 1.302        |

Table S4. Comparisons of HER activities of various SACs with and without spin treatment.

| Single TM<br>atom | Without spin          |                                | With spin             |                                |
|-------------------|-----------------------|--------------------------------|-----------------------|--------------------------------|
|                   | $\Delta G_{H^*}$ (eV) | Magnetic<br>moment ( $\mu B$ ) | $\Delta G_{H^*}$ (eV) | Magnetic<br>moment ( $\mu B$ ) |
| Sc                | 0.083                 | /                              | 0.084                 | 0                              |
| Ti                | -0.004                | /                              | 0.061                 | 1.25                           |
| V                 | -0.051                | /                              | 0.218                 | 1.61                           |
| Cr                | 0.712                 | /                              | 0.885                 | 2.02                           |
| Mn                | 0.628                 | /                              | 0.402                 | 1.13                           |
| Fe                | 0.400                 | /                              | 0.415                 | 0.52                           |
| Co                | 0.565                 | /                              | 0.558                 | 0.74                           |
| Ni                | 0.559                 | /                              | 0.607                 | 0.70                           |
| Cu                | 0.861                 | /                              | 0.857                 | 0.33                           |
| Nb                | -0.368                | /                              | -0.387                | 1.39                           |
| Mo                | 0.221                 | /                              | 0.275                 | 0                              |
| Tc                | 0.588                 | /                              | 0.586                 | 0.02                           |
| Ru                | 0.134                 | /                              | 0.131                 | 0                              |
| Rh                | 0.549                 | /                              | 0.508                 | 0.59                           |
| Pd                | 0.889                 | /                              | 0.893                 | 0                              |
| Ag                | 0.805                 | /                              | 0.808                 | 0                              |
| Ta                | -0.811                | /                              | -0.724                | 0.72                           |
| Re                | 0.321                 | /                              | 0.327                 | 0                              |
| Os                | -0.172                | /                              | -0.166                | 0                              |
| Ir                | 0.017                 | /                              | 0.012                 | 0                              |
| Pt                | 0.446                 | /                              | 0.439                 | 0                              |
| Au                | -0.331                | /                              | -0.327                | 0                              |

Table S5. Comparison of OER activity of Pt@NP with and without spin treatment.

| System | Without spin |              |              |              | With spin    |              |              |              |
|--------|--------------|--------------|--------------|--------------|--------------|--------------|--------------|--------------|
|        | $\Delta G_1$ | $\Delta G_2$ | $\Delta G_3$ | $\Delta G_4$ | $\Delta G_1$ | $\Delta G_2$ | $\Delta G_3$ | $\Delta G_4$ |
| Pt@NP  | 1.507        | 1.342        | 1.725        | 0.346        | 1.507        | 1.297        | 1.770        | 0.346        |

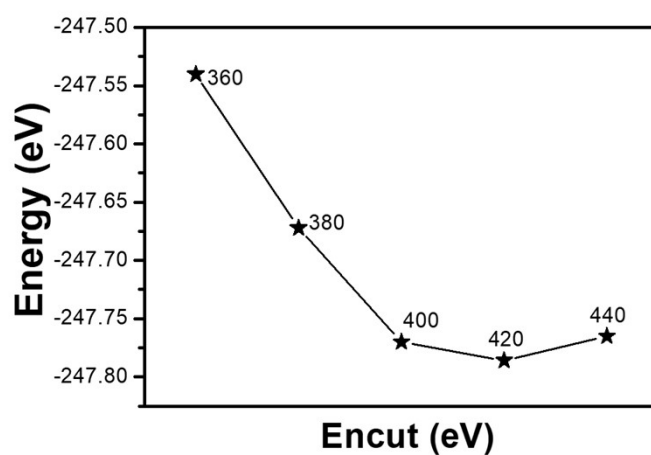

Fig. S1. The energies of NP monolayer calculated with different cut-off.

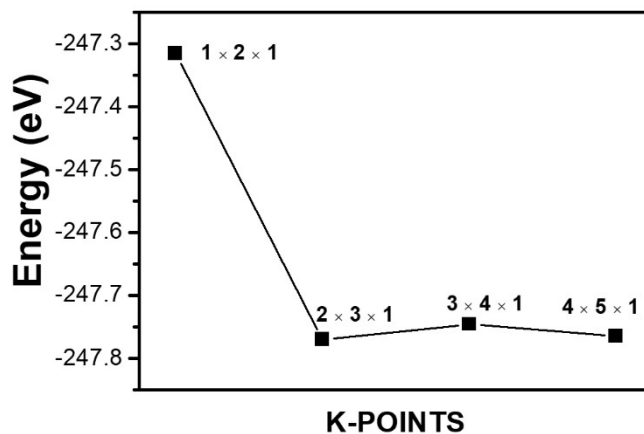

Fig. S2. The energies of NP monolayer calculated with different  $k$ -points.

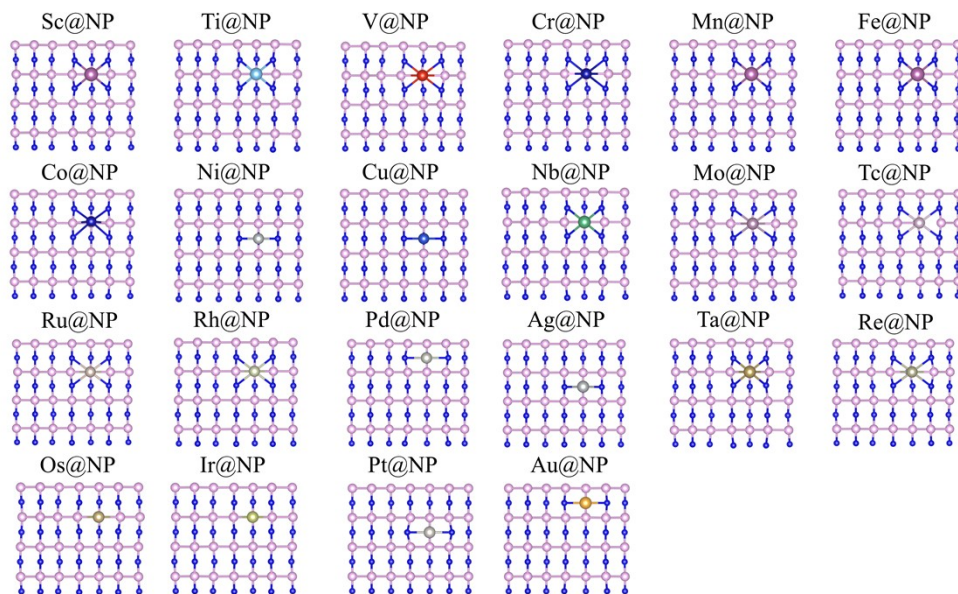

**Fig. S3.** The optimized configurations of metal anchored on NP monolayer.

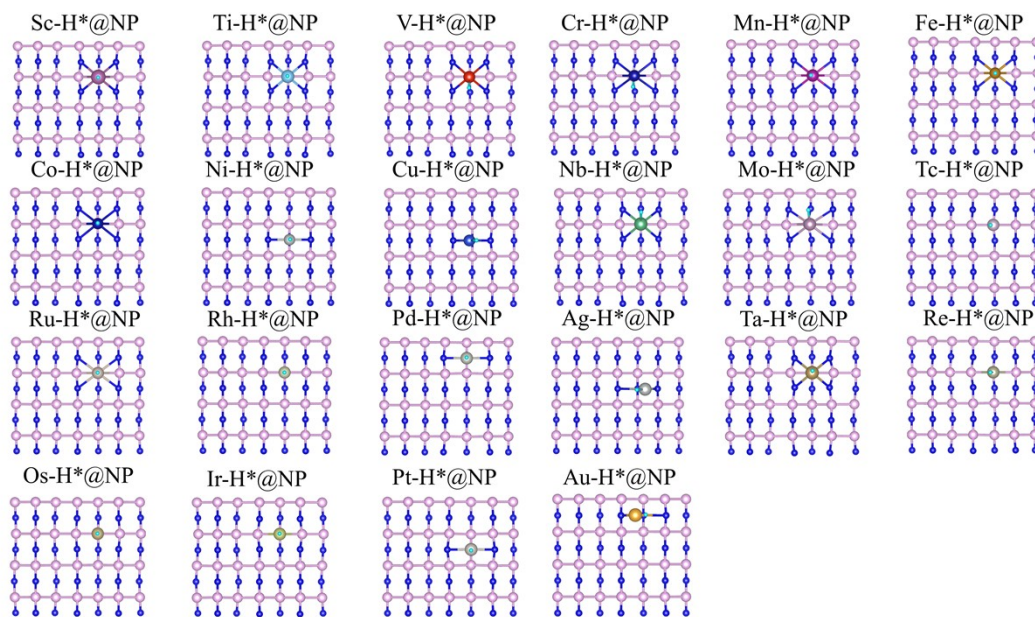

**Fig. S4.** Configurations of species (H) on single TM atom supported on NP monolayer.

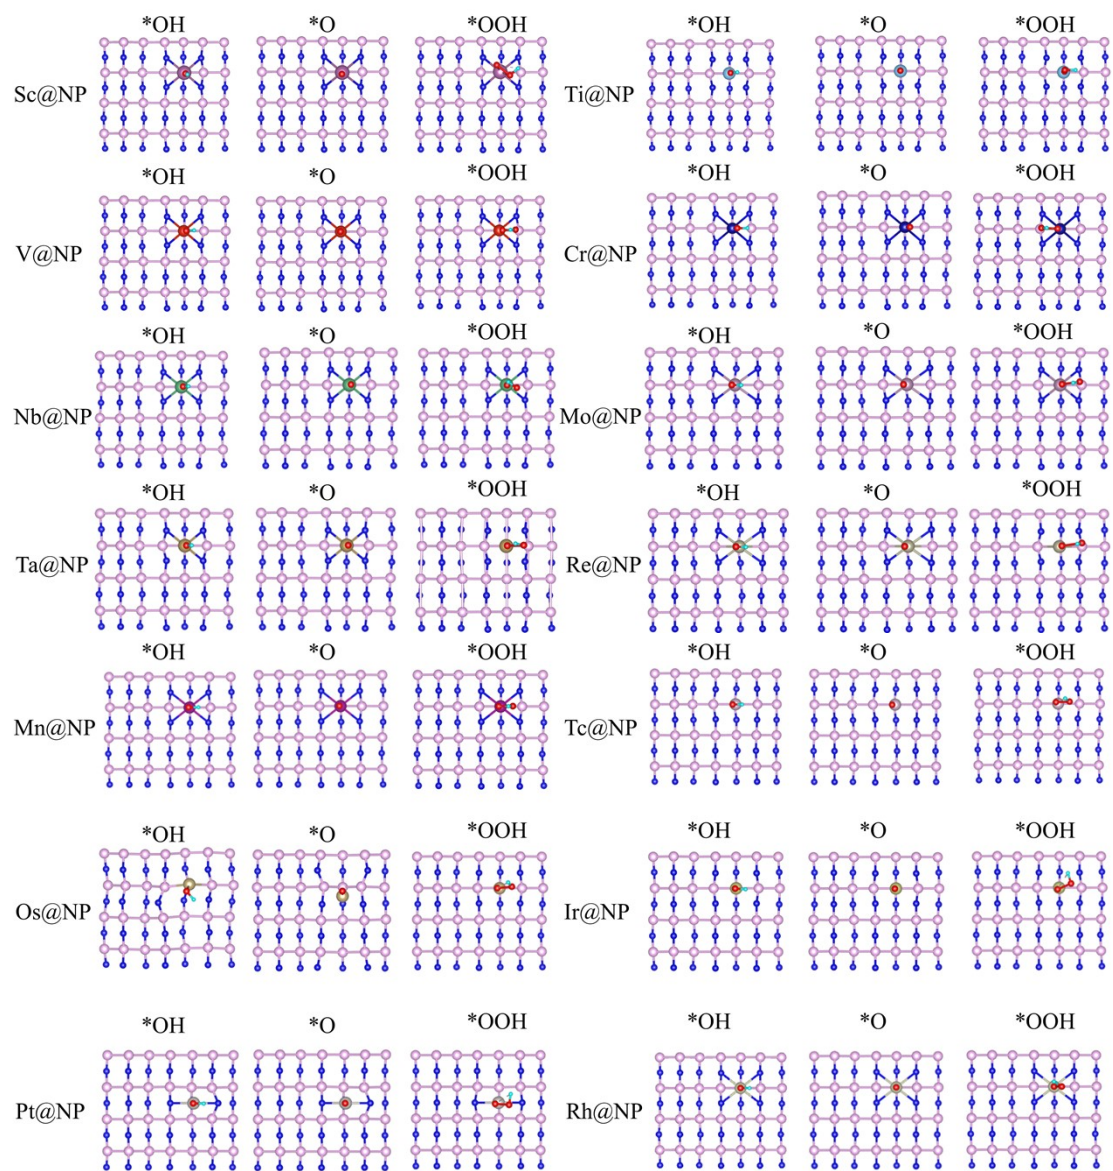

**Fig. S5.** Configurations of adsorbates (OH, O, OOH) on single TM atom supported on NP monolayer.



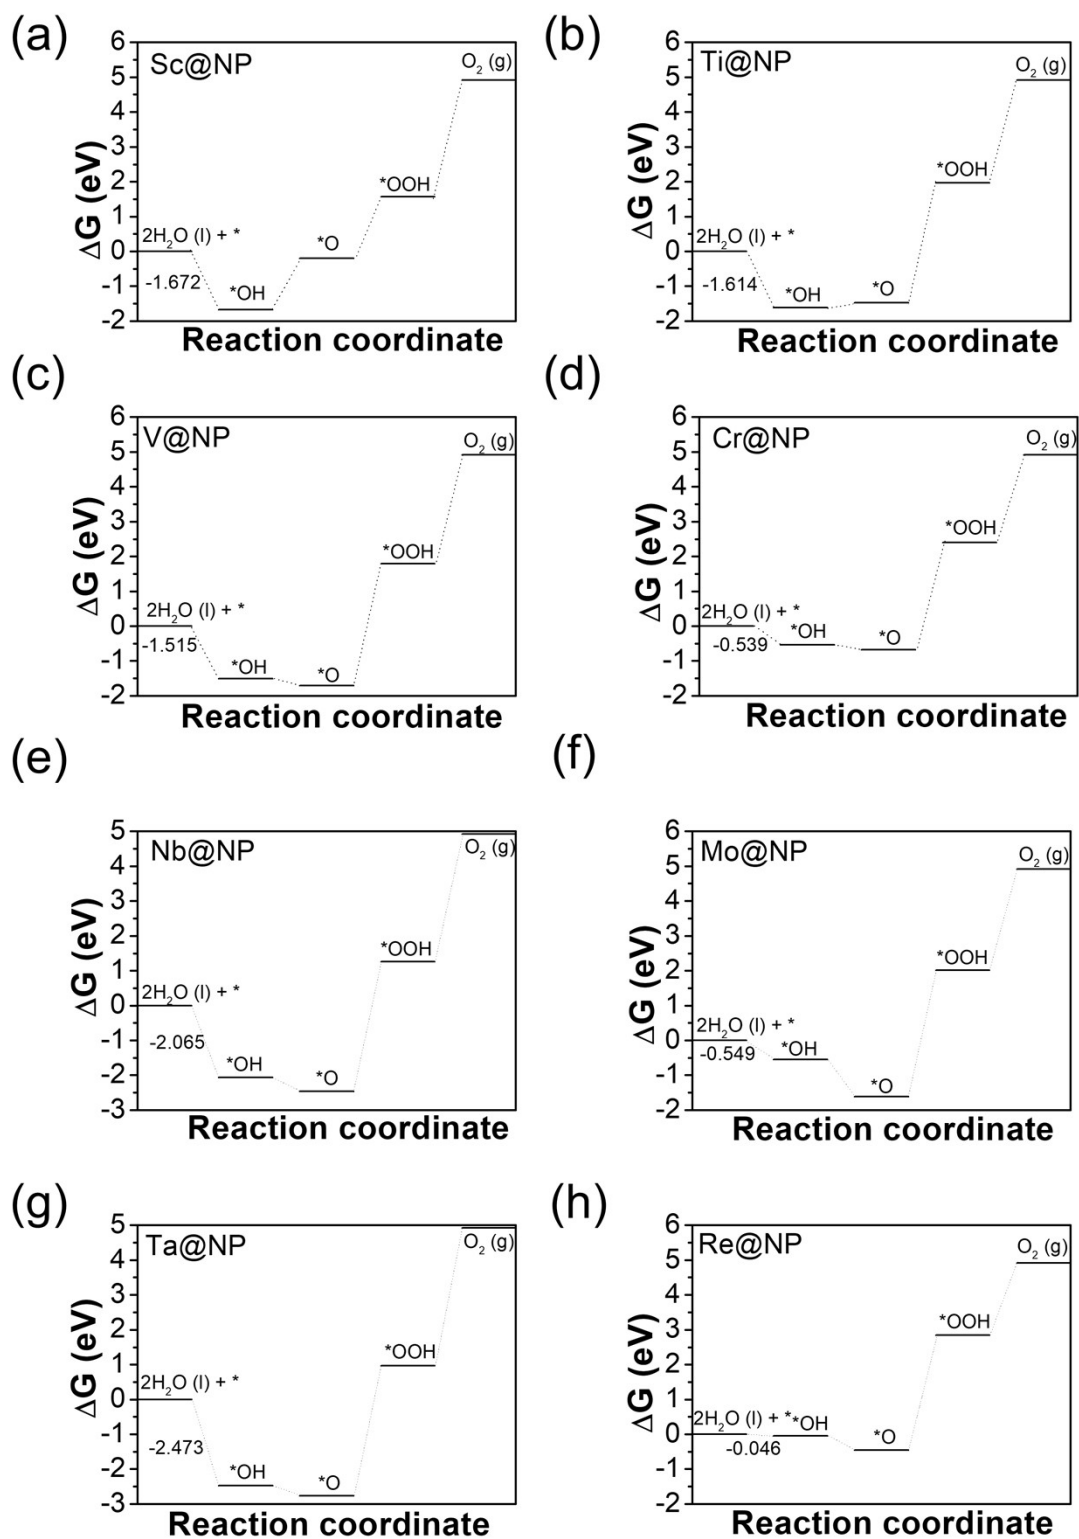

**Fig. S6.** The calculated free energy diagram of the OER of TM@NP SACs at the zero potential ( $U = 0$  V). (a) Sc@NP. (b) Ti@NP. (c) V@NP. (d) Cr@NP. (e) Nb@NP. (f) Mo@NP. (g) Ta@NP. (h) Re@NP.

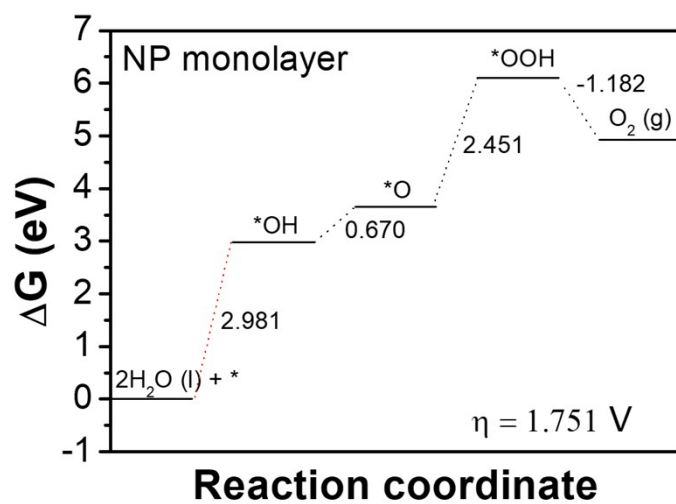

**Fig. S7.** The calculated free energy diagram of the OER of NP monolayer at the zero potential ( $U = 0 \text{ V}$ ), where the potential-determining step of the elementary reaction was marked in red.

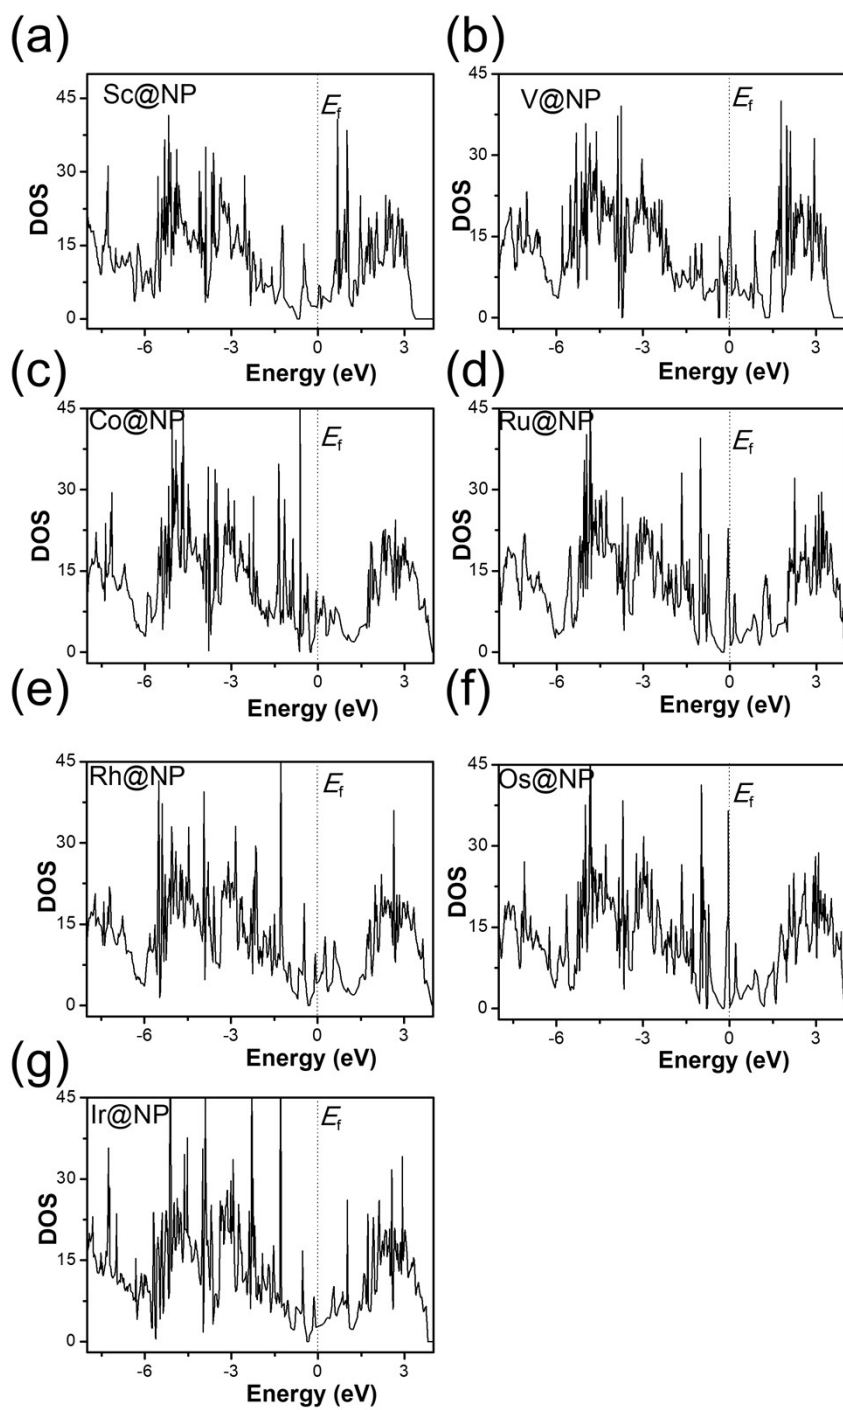

**Fig. S8.** The calculated DOS of the (a) Sc@NP. (b) V@NP. (c) Co@NP. (d) Ru@NP. (e) Rh@NP. (f) Os@NP. (g) Ir@NP. The Fermi level was set at the zero energy and marked by the black dash line.

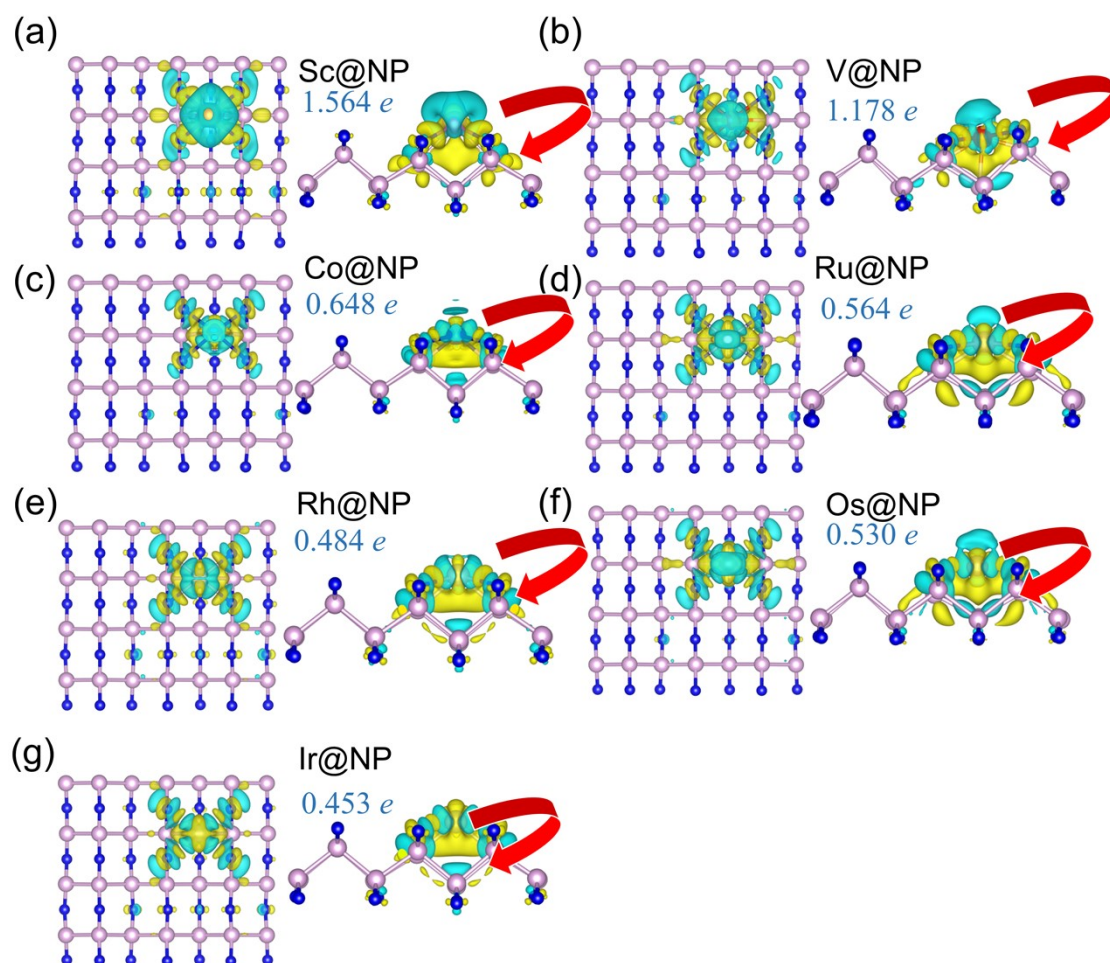

**Fig. S9.** The charge density difference as well as the amounts of charge transfer of (a) Sc@NP. (b) V@NP. (c) Co@NP. (d) Ru@NP. (e) Rh@NP. (f) Os@NP. (g) Ir@NP.

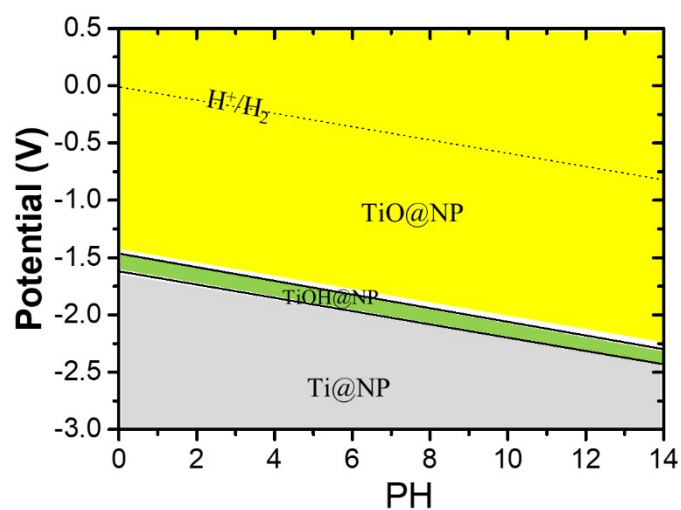

**Fig. S10.** The calculated Pourbaix diagram of Ti@NP.

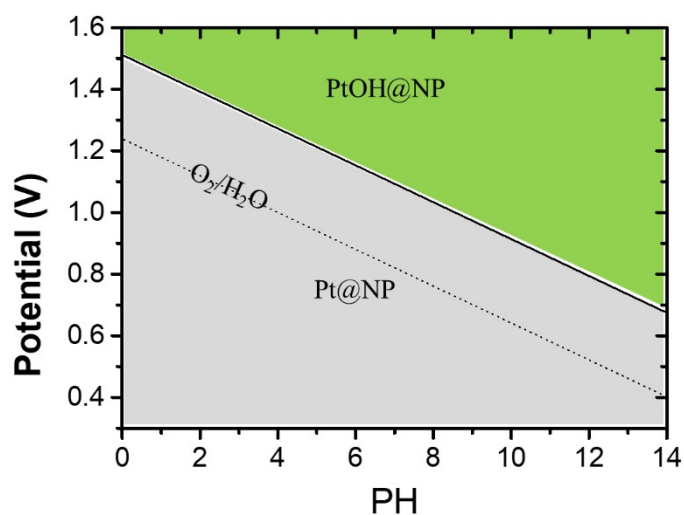

**Fig. S11.** The calculated Pourbaix diagram of Pt@NP.

## References

1. Y. Nie, J. Zhang, W. Chen, Q. Xia, X. Wang and G.-h. Guo, *Phys Rev B*, 2020, **101**.
2. Z. Cheng, X. Zhang, H. Zhang, J. Gao, H. Liu, X. Yu, X. Dai, G. Liu and G. Chen, *Applied Surface Science*, 2021, **547**.
